# Supplementary material for: Semi-Targeted Profiling of Bile Acids by High-Resolution Mass Spectrometry in a Rat Model of Drug-Induced Liver Injury
Source: MDPI journal article supplement (doi:10.3390/ijms24032489), 2023-01-27
Supplement: s1 [file s1]

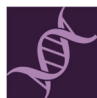

*Supplemental Material*

# Semi-Targeted Profiling of Bile Acids by High-Resolution Mass Spectrometry in a Rat Model of Drug-Induced Liver Injury

Myriam Mireault, Vivaldy Prinville, Leanne Ohlund and Lekha Sleno \*

Department of Chemistry, Université du Québec à Montréal (UQAM), P.O. Box 8888, Downtown Station, Montreal, QC H3P 3C8, Canada

\* Correspondence: sleno.lekha@uqam.ca

**Table S1.** Internal standards chosen for data normalization assigned for standard bile acids

**Table S2.** Assigned bile acids (present in standard mix) having significant changes in rat plasma treated with low and high APAP dose, with LC-MS data

**Table S3.** Summary of LC-MS/MS data for unconjugated bile acids from standard mix

**Table S4.** Summary of LC-MS/MS data for conjugated bile acids from standard mix

**Table S5.** Summary of LC-MS/MS data for tentatively-assigned bile acid isomers having significant changes between lowest and highest APAP dose

**Figure S1.** Extracted ion chromatograms of metabolites formed in human S9 fraction with NADPH and PAPS. Diamond represents retention time of the parent molecule. The peaks were scaled and annotated as follows: ♦ increased 5x, \* increased 10x and \*\* increased 20x, for clarity.

**Table S1.** Internal standards chosen for data normalization assigned for standard bile acids.

| Bile Acid                                                                       | Internal Standard    |
|---------------------------------------------------------------------------------|----------------------|
| NDCA, DHLCA, 7-keto-LCA, 12-keto-LCA, APCA, LCA, muro-CA, UDCA, HDCA, CDCA, DCA | DCA-d <sub>4</sub>   |
| ACA, CA, 7-keto-DCA, 3-DHCA, UCA, ω-MCA, α-MCA, β-MCA                           | CA-d <sub>4</sub>    |
| GUDCA, GHDCa                                                                    | GUDCA-d <sub>4</sub> |
| GCDCA                                                                           | GCDCA-d <sub>4</sub> |
| GDCA                                                                            | GDCA-d <sub>4</sub>  |
| GHCA, GCA                                                                       | GCA-d <sub>4</sub>   |
| TUDCA                                                                           | TUDCA-d <sub>4</sub> |
| TCDCA                                                                           | TCDCA-d <sub>4</sub> |
| TDCA                                                                            | TDCA-d <sub>6</sub>  |
| T-ω-MCA, T-α-MCA, T-β-MCA, THCA, TCA                                            | TCA-d <sub>4</sub>   |

**Table S2.** Assigned bile acids (present in standard mix) having significant changes in rat plasma treated with low and high APAP dose, with LC-MS data.

| Bile Acid  | Formula                                         | <i>m/z</i> [M-H] <sup>-</sup> | ppm  | RT (min) | <i>p</i> -value | Fold Change (600/75 dose) |
|------------|-------------------------------------------------|-------------------------------|------|----------|-----------------|---------------------------|
| APCA       | C <sub>24</sub> H <sub>38</sub> O <sub>4</sub>  | 389.2701                      | 0.9  | 28.9     | 0.0056          | 5.5                       |
| 7-keto-DCA | C <sub>24</sub> H <sub>38</sub> O <sub>5</sub>  | 405.2647                      | 0.1  | 17.4     | 0.0046          | 7.6                       |
| muro-CA    | C <sub>24</sub> H <sub>40</sub> O <sub>4</sub>  | 391.2855                      | 0.3  | 21.7     | 0.045           | 34.8                      |
| HDCA       | C <sub>24</sub> H <sub>40</sub> O <sub>4</sub>  | 391.2852                      | -0.5 | 25.1     | 0.019           | 6.4                       |
| DCA        | C <sub>24</sub> H <sub>40</sub> O <sub>4</sub>  | 391.2861                      | 1.8  | 33.6     | 0.00058         | 6.0                       |
| UCA        | C <sub>24</sub> H <sub>40</sub> O <sub>5</sub>  | 407.2805                      | -0.5 | 12.6     | 0.046           | 6.3                       |
| ω-MCA      | C <sub>24</sub> H <sub>40</sub> O <sub>5</sub>  | 407.2794                      | -2.2 | 16.0     | 0.043           | 7.1                       |
| α-MCA      | C <sub>24</sub> H <sub>40</sub> O <sub>5</sub>  | 407.2797                      | 1.5  | 17.0     | 0.030           | 3.8                       |
| ACA        | C <sub>24</sub> H <sub>40</sub> O <sub>5</sub>  | 407.2786                      | 4.2  | 21.0     | 0.036           | 7.9                       |
| CA         | C <sub>24</sub> H <sub>40</sub> O <sub>5</sub>  | 407.2796                      | -1.7 | 23.2     | 0.0067          | 2.4                       |
| GHDCa      | C <sub>26</sub> H <sub>43</sub> NO <sub>5</sub> | 448.3066                      | -0.6 | 17.5     | 0.042           | 7.5                       |
| GDCA       | C <sub>26</sub> H <sub>43</sub> NO <sub>5</sub> | 448.3065                      | -0.8 | 26.3     | 0.0021          | 10.6                      |
| GCA        | C <sub>26</sub> H <sub>43</sub> NO <sub>6</sub> | 464.3015                      | -0.6 | 16.8     | 0.0033          | 3.5                       |

\* Fold change is derived from comparing peak area ratios of each assigned bile acid with its corresponding IS peak for normalization.

**Table S3.** Summary of LC-MS/MS data for unconjugated bile acids from standard mix.

| Bile acid   | Formula                                        | <i>m/z</i> [M-H] <sup>-</sup> | ppm  | RT (min) | Selected MS/MS fragments* ( <i>m/z</i> )                                             |
|-------------|------------------------------------------------|-------------------------------|------|----------|--------------------------------------------------------------------------------------|
| NCDA        | C <sub>23</sub> H <sub>38</sub> O <sub>4</sub> | 377.2717                      | 5.2  | 17.0     | -                                                                                    |
| NUDCA       | C <sub>23</sub> H <sub>38</sub> O <sub>4</sub> | 377.2699                      | 0.4  | 28.0     | 333.2786, <b>331.2649**</b> , 313.2511                                               |
| NCA         | C <sub>23</sub> H <sub>38</sub> O <sub>5</sub> | 393.2637                      | -2.4 | 17.0     | 331.2626, <b>329.2463</b> , 275.2036                                                 |
| DHCA        | C <sub>24</sub> H <sub>34</sub> O <sub>5</sub> | 401.2337                      | 0.9  | 13.8     | 383.2193, <b>331.1925**</b> , 313.1801**, 291.1606, 269.1903, 249.1485**, 215.1446** |
| DHLCA       | C <sub>24</sub> H <sub>38</sub> O <sub>3</sub> | 373.2774                      | 6.9  | 43.6     | -                                                                                    |
| 7-keto-LCA  | C <sub>24</sub> H <sub>38</sub> O <sub>4</sub> | 389.2724                      | 6.8  | 27.6     | -                                                                                    |
| 12-keto-LCA | C <sub>24</sub> H <sub>38</sub> O <sub>4</sub> | 389.2723                      | 6.6  | 28.5     | 343.2667, <b>325.2539</b>                                                            |
| APCA        | C <sub>24</sub> H <sub>38</sub> O <sub>4</sub> | 389.2693                      | 1.1  | 29.0     | <b>371.2575</b> , 243.1745, 169.0876                                                 |
| 7-keto-DCA  | C <sub>24</sub> H <sub>38</sub> O <sub>5</sub> | 405.2654                      | -1.9 | 17.2     | <b>361.2738</b> , 343.2619, 289.2164                                                 |
| 3-DHCA      | C <sub>24</sub> H <sub>38</sub> O <sub>5</sub> | 405.2654                      | 1.9  | 21.7     | <b>361.2767</b> , 343.2658, 289.2179,                                                |

|         |                                                |          |      |      |                                                          |
|---------|------------------------------------------------|----------|------|------|----------------------------------------------------------|
| LCA     | C <sub>24</sub> H <sub>40</sub> O <sub>3</sub> | 375.2933 | 7.5  | 43.4 | -                                                        |
| muro-CA | C <sub>24</sub> H <sub>40</sub> O <sub>4</sub> | 391.2883 | 7.5  | 21.7 | -                                                        |
| UDCA    | C <sub>24</sub> H <sub>40</sub> O <sub>4</sub> | 391.2877 | 5.9  | 23.8 | -                                                        |
| HDCA    | C <sub>24</sub> H <sub>40</sub> O <sub>4</sub> | 391.2879 | 6.4  | 25.0 | -                                                        |
| CDCA    | C <sub>24</sub> H <sub>40</sub> O <sub>4</sub> | 391.2878 | 6.2  | 32.4 | -                                                        |
| DCA     | C <sub>24</sub> H <sub>40</sub> O <sub>4</sub> | 391.2862 | -2.1 | 33.5 | 355.2641, 347.2948, <b>345.2783</b> , 343.2635, 327.2695 |
| IDCA    | C <sub>24</sub> H <sub>40</sub> O <sub>4</sub> | 391.2858 | 1.1  | 39.8 | 347.2980, <b>345.2800</b> <sup>**</sup> , 327.2703       |
| UCA     | C <sub>24</sub> H <sub>40</sub> O <sub>5</sub> | 407.2828 | 6.1  | 12.4 | <b>345.2817</b> , 343.2673, 327.2708, 325.2568           |
| ω-MCA   | C <sub>24</sub> H <sub>40</sub> O <sub>5</sub> | 407.2828 | 6.1  | 15.8 | <b>405.2672</b>                                          |
| α-MCA   | C <sub>24</sub> H <sub>40</sub> O <sub>5</sub> | 407.2829 | 6.4  | 16.8 | <b>405.2675</b> <sup>**</sup> , 387.2575, 371.2595       |
| β-MCA   | C <sub>24</sub> H <sub>40</sub> O <sub>5</sub> | 407.2823 | 4.9  | 17.9 | <b>371.2578</b>                                          |
| ACA     | C <sub>24</sub> H <sub>40</sub> O <sub>5</sub> | 407.2828 | 6.1  | 20.8 | <b>389.2724</b>                                          |
| CA      | C <sub>24</sub> H <sub>40</sub> O <sub>5</sub> | 407.2831 | 6.9  | 23.0 | 363.2938, 361.2769, <b>345.2817</b>                      |

\* Fragment ions > 1% intensity and \*\* fragment ions > 5% intensity, most intense fragment in each spectrum bolded. No MS/MS acquired in data-dependent mode for those without any fragment ions listed.

**Table S4.** Summary of LC-MS/MS data for conjugated bile acids from standard mix.

| Bile acid | Formula                                           | <i>m/z</i> [M-H] <sup>-</sup> | ppm  | RT (min) | Selected MS/MS Fragments                |
|-----------|---------------------------------------------------|-------------------------------|------|----------|-----------------------------------------|
| GDHCA     | C <sub>26</sub> H <sub>37</sub> NO <sub>6</sub>   | 458.2568                      | 4.3  | 8.6      | 348.1847*, <b>74.0248</b> <sup>**</sup> |
| GHCA      | C <sub>26</sub> H <sub>43</sub> NO <sub>6</sub>   | 464.3037                      | 4.2  | 14.0     | <b>74.0245</b> <sup>**</sup>            |
| GUDCA     | C <sub>26</sub> H <sub>43</sub> NO <sub>5</sub>   | 448.308                       | 2.6  | 16.2     | 386.3089*, <b>74.0244</b> <sup>**</sup> |
| GCA       | C <sub>26</sub> H <sub>43</sub> NO <sub>6</sub>   | 464.3042                      | 5.3  | 16.7     | 402.3051*, <b>74.0247</b> <sup>**</sup> |
| GHDCA     | C <sub>26</sub> H <sub>43</sub> NO <sub>5</sub>   | 448.3081                      | 2.8  | 17.3     | 386.3084*, <b>74.0245</b> <sup>**</sup> |
| GCDCA     | C <sub>26</sub> H <sub>43</sub> NO <sub>5</sub>   | 448.3089                      | 4.6  | 24.9     | 386.3102*, <b>74.0243</b> <sup>**</sup> |
| GDCA      | C <sub>26</sub> H <sub>43</sub> NO <sub>5</sub>   | 448.3075                      | -1.5 | 26.1     | 404.3166*, <b>74.0242</b> <sup>*</sup>  |
| GLCA      | C <sub>26</sub> H <sub>43</sub> NO <sub>4</sub>   | 432.3125                      | 1.3  | 36.1     | 388.3234*, <b>74.0247</b> <sup>**</sup> |
| TDHCA     | C <sub>26</sub> H <sub>39</sub> NO <sub>7</sub> S | 508.2398                      | 4.6  | 8.0      | <b>124.0076</b>                         |
| T-ω-MCA   | C <sub>26</sub> H <sub>45</sub> NO <sub>7</sub> S | 514.2868                      | 4.7  | 9.8      | <b>124.0077</b>                         |
| T-α-MCA   | C <sub>26</sub> H <sub>45</sub> NO <sub>7</sub> S | 514.286                       | 3.1  | 10.4     | <b>124.0074</b>                         |
| T-β-MCA   | C <sub>26</sub> H <sub>45</sub> NO <sub>7</sub> S | 514.2871                      | 5.3  | 10.9     | <b>124.0074</b>                         |
| THCA      | C <sub>26</sub> H <sub>45</sub> NO <sub>7</sub> S | 514.2876                      | 6.2  | 13.7     | <b>124.0086</b>                         |
| TUDCA     | C <sub>26</sub> H <sub>45</sub> NO <sub>6</sub> S | 498.2917                      | 4.4  | 16.0     | <b>124.0077</b>                         |
| TCA       | C <sub>26</sub> H <sub>45</sub> NO <sub>7</sub> S | 514.2879                      | 6.8  | 16.8     | <b>124.0076</b>                         |
| TCDCa     | C <sub>26</sub> H <sub>45</sub> NO <sub>6</sub> S | 498.2917                      | 4.4  | 24.7     | <b>124.0072</b>                         |
| TDCA      | C <sub>26</sub> H <sub>45</sub> NO <sub>6</sub> S | 498.2916                      | 4.2  | 26.3     | <b>124.0073</b>                         |
| TLCA      | C <sub>26</sub> H <sub>45</sub> NO <sub>5</sub> S | 482.2944                      | -0.4 | 36.5     | <b>79.9577</b>                          |

\* Fragment ions > 1% intensity and \*\* fragment ions > 5% intensity, most intense fragment in each spectrum bolded.

**Table S5.** Summary of LC-MS/MS data for tentatively assigned bile acid isomers having significant changes between lowest and highest APAP doses.

| Bile acid       | Formula                                         | <i>m/z</i> [M-H] <sup>-</sup> | ppm  | RT (min) | Selected MS/MS Fragments*                                 |
|-----------------|-------------------------------------------------|-------------------------------|------|----------|-----------------------------------------------------------|
| keto-LCA isomer | C <sub>24</sub> H <sub>38</sub> O <sub>4</sub>  | 389.2694                      | -0.9 | 23.6     | -                                                         |
|                 |                                                 | 389.2692                      | -1.4 | 25.9     | -                                                         |
|                 |                                                 | 389.2694                      | -0.9 | 30.3     | <b>371.2593</b> , 353.2486, 327.2690, 243.1768            |
| keto-DCA isomer | C <sub>24</sub> H <sub>38</sub> O <sub>5</sub>  | 405.2644                      | -0.6 | 10.2     | <b>387.2553</b> , 369.2416                                |
|                 |                                                 | 405.264                       | -1.6 | 15.3     | 387.2530**, <b>369.2424**</b> , 361.2781, 351.2324        |
|                 |                                                 | 405.2649                      | 0.6  | 15.8     | <b>387.2526**</b> , 369.2419**                            |
|                 |                                                 | 405.264                       | -1.6 | 17.8     | -                                                         |
|                 |                                                 | 405.2638                      | -2.1 | 18.5     | <b>387.2532**</b> , 369.2431**                            |
| CDCA isomer     | C <sub>24</sub> H <sub>40</sub> O <sub>4</sub>  | 391.2845                      | 2.3  | 22.5     | -                                                         |
|                 |                                                 | 391.2851                      | -0.7 | 25.3     | 347.2956, <b>345.2803</b> , 343.2619, 327.2685            |
|                 |                                                 | 391.2856                      | 0.6  | 26.7     | 347.2973, <b>345.2799**</b> , 343.2643,                   |
| CA isomer       | C <sub>24</sub> H <sub>40</sub> O <sub>5</sub>  | 407.2803                      | 0    | 14.3     | 389.2360, 361.2056, 346.2845, <b>345.2800**</b> , 59.0140 |
| GCDCA isomer    | C <sub>26</sub> H <sub>43</sub> NO <sub>5</sub> | 448.3059                      | -2.1 | 13.8     | 402.2263, 386.3036, <b>74.0247**</b>                      |
|                 |                                                 | 448.3063                      | -1.2 | 19.4     | 402.3014, <b>74.0249**</b>                                |
| GCA isomer      | C <sub>26</sub> H <sub>43</sub> NO <sub>6</sub> | 464.3                         | -3.8 | 6.7      | <b>74.0249**</b>                                          |
|                 |                                                 | 464.3015                      | -0.6 | 8.4      | 420.3101, <b>74.0247**</b>                                |
|                 |                                                 | 464.3008                      | -2.1 | 9.5      | 420.3081, 402.3007, <b>74.0250**</b>                      |
|                 |                                                 | 464.3008                      | -2.1 | 10.8     | <b>74.0248**</b>                                          |

\* Fragment ions > 1% intensity and \*\* fragment ions > 5% intensity, most intense fragment in each spectrum bolded. No MS/MS acquired in data-dependent mode for those without any fragment ions listed.

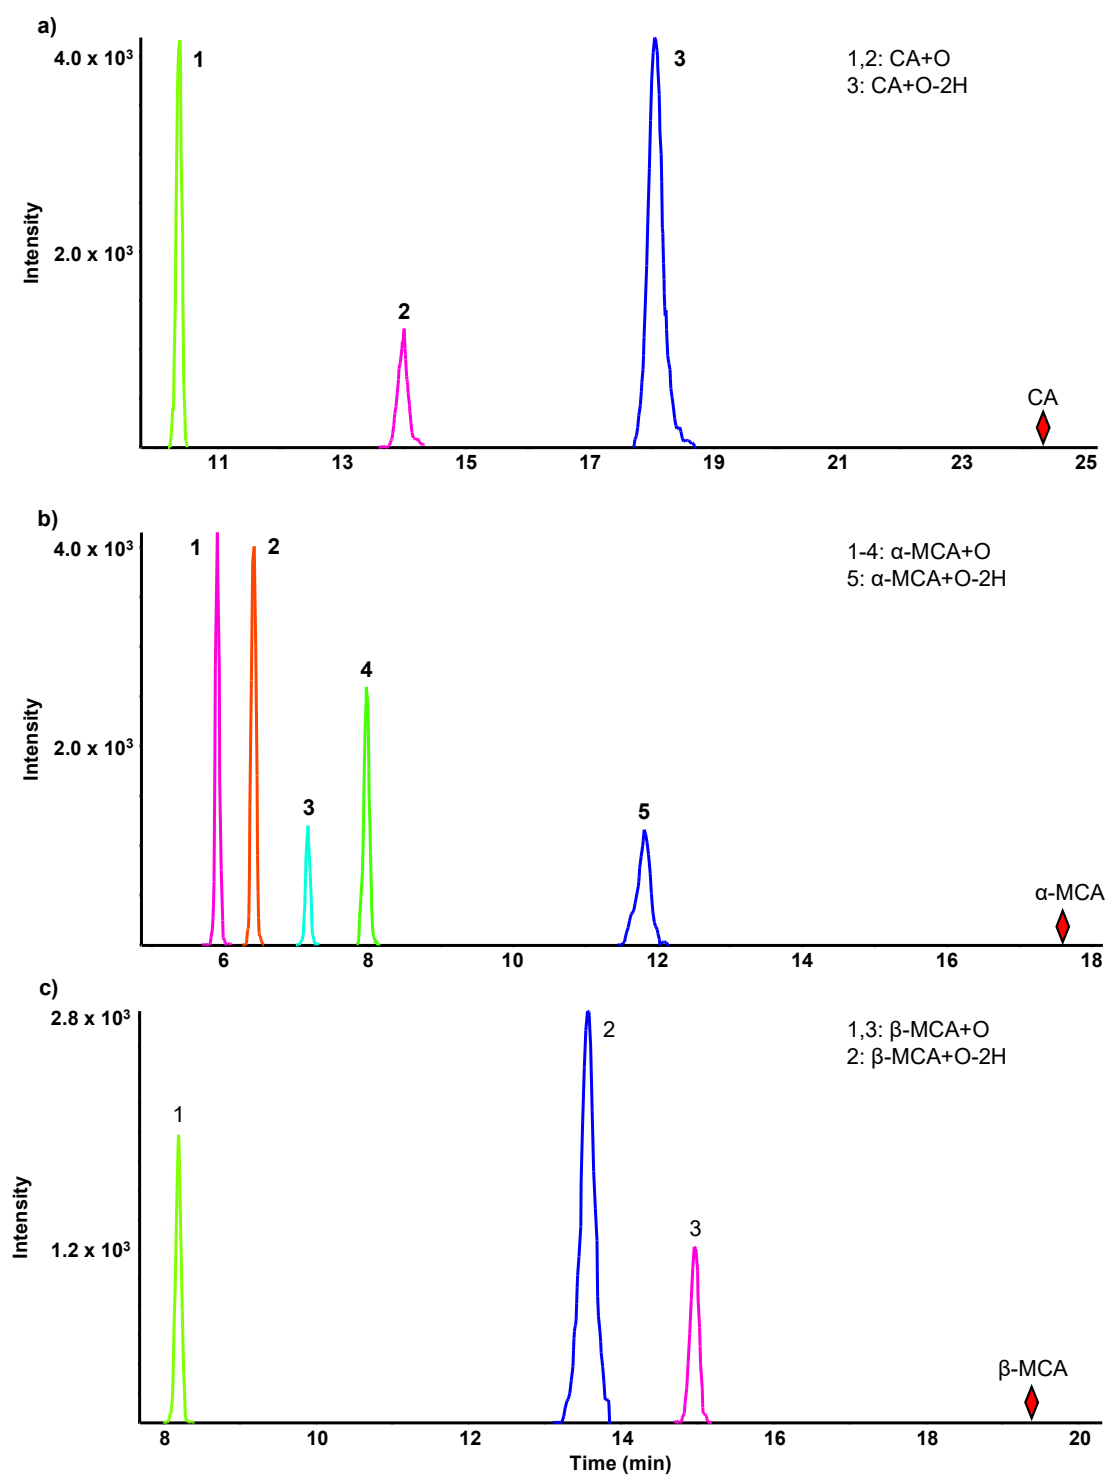

**Figure S1** Extracted ion chromatograms of metabolites from a) CA, b)  $\alpha$ -MCA and c)  $\beta$ -MCA formed in human S9 fraction with NADPH and PAPS. Diamond represents retention time of the parent molecule. The peaks were scaled and annotated as follows:  $\diamond$  increased 5x, \* increased 10x and \*\* increased 20x, for clarity.

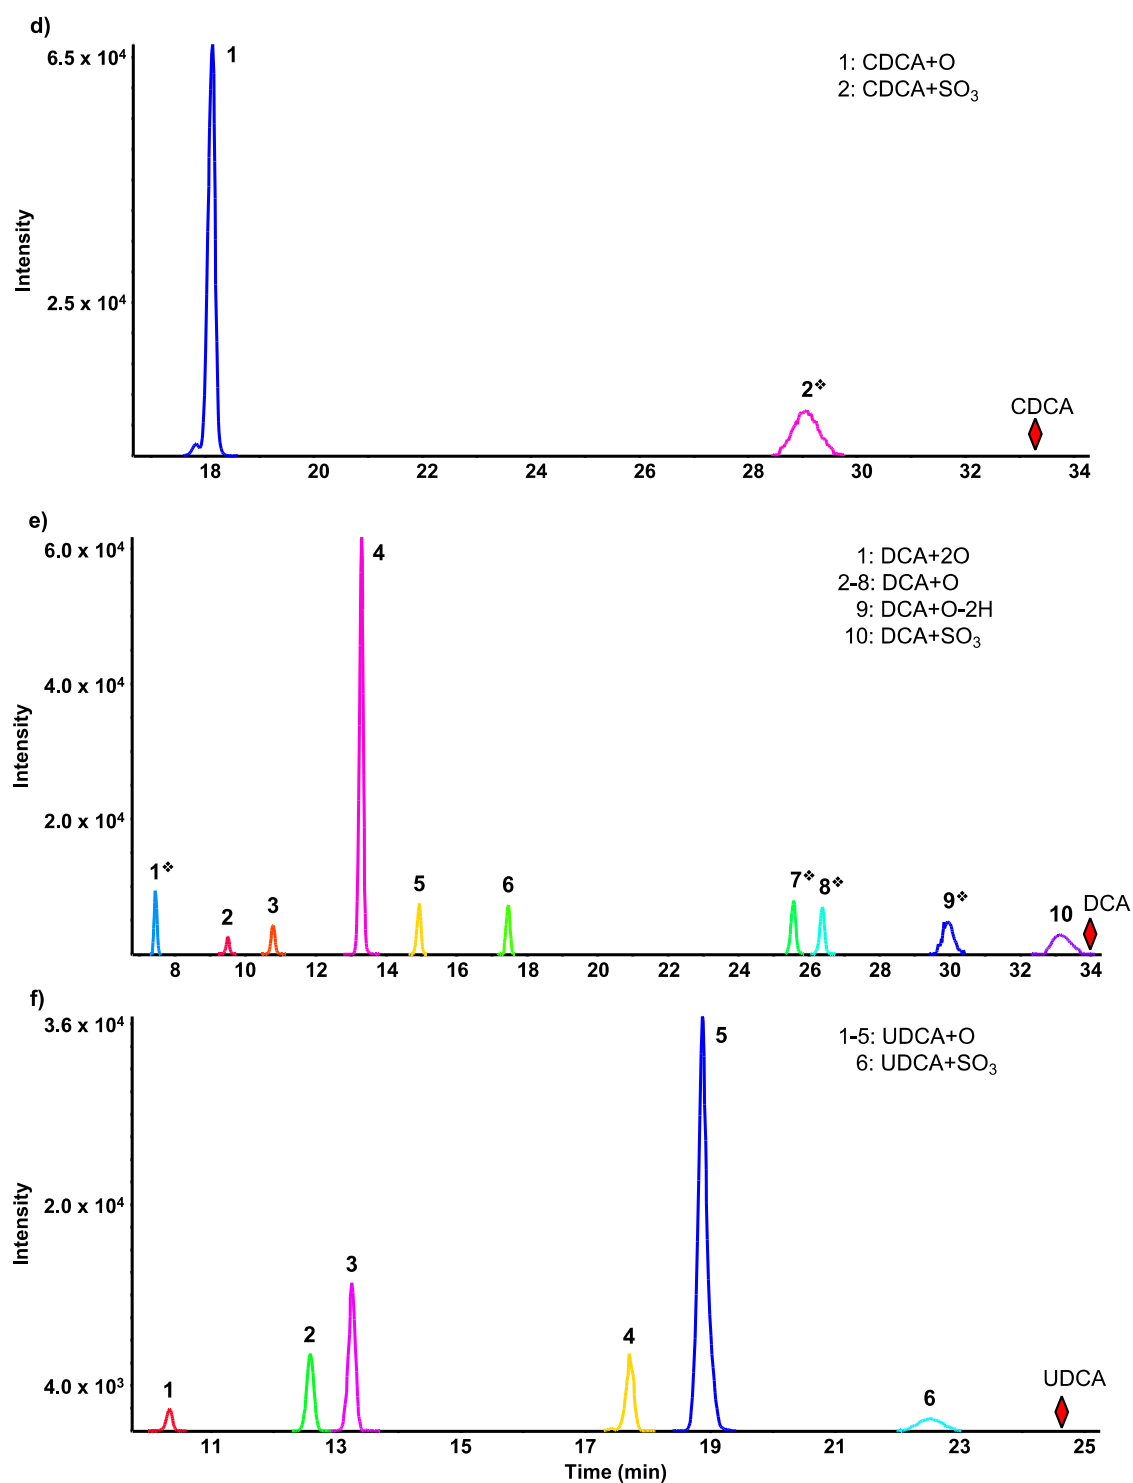

**Figure S1 (continued).** Extracted ion chromatograms of metabolites from d) CDCA, e) DCA and f) UDCA formed in human S9 fraction with NADPH and PAPS. Diamond represents retention time of the parent molecule. The peaks were scaled and annotated as follows: ♦ increased 5x, \* increased 10x and \*\* increased 20x, for clarity.

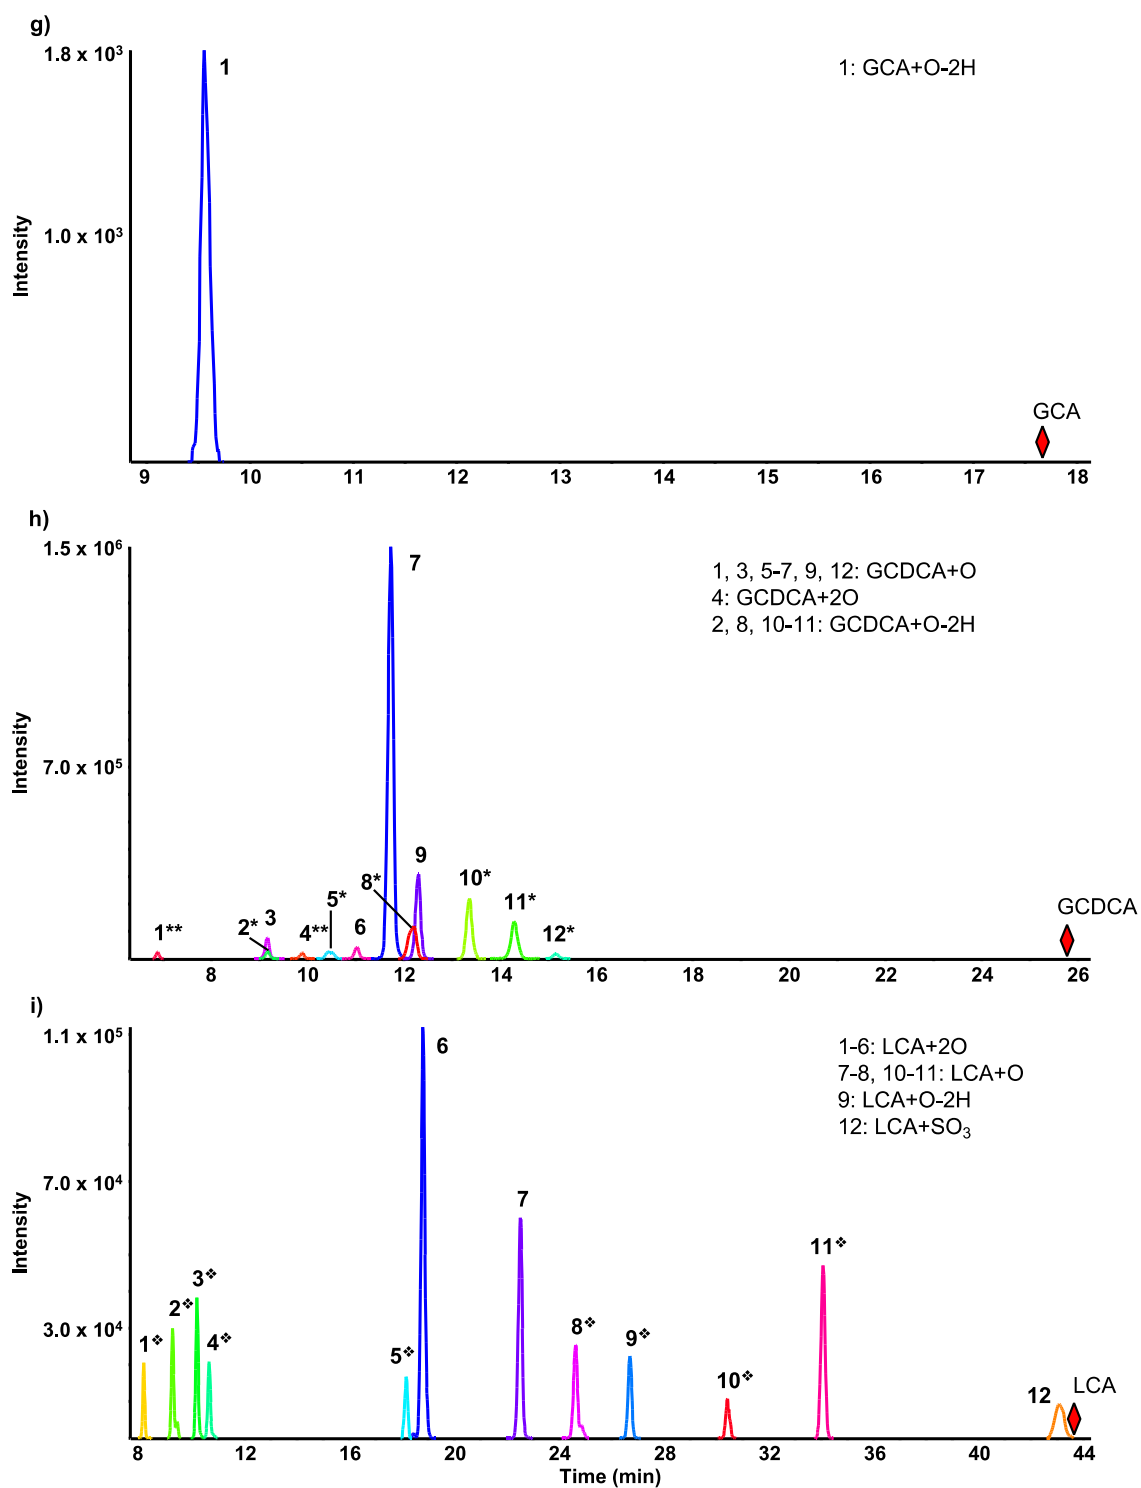

**Figure S1 (continued).** Extracted ion chromatograms of metabolites from g) GCA and h) GCDCA and i) LCA formed in human S9 fraction with NADPH and PAPS. Diamond represents retention time of the parent molecule. The peaks were scaled and annotated as follows: ♦ increased 5x, \* increased 10x and \*\* increased 20x, for clarity.
